# Supplementary material for: Acquisition of epithelial plasticity in human chronic liver disease
Source: PubMed Central journal article supplement (PMC11153150; doi:10.1038/s41586-024-07465-2), 2024-05-22
Supplement: 41586_2024_7465_MOESM1_ESM.pdf [file 41586_2024_7465_MOESM1_ESM.pdf]

## Reporting Summary

Nature Portfolio wishes to improve the reproducibility of the work that we publish. This form provides structure for consistency and transparency in reporting. For further information on Nature Portfolio policies, see our [Editorial Policies](#) and the [Editorial Policy Checklist](#).

### Statistics

For all statistical analyses, confirm that the following items are present in the figure legend, table legend, main text, or Methods section.

n/a Confirmed

- The exact sample size ( $n$ ) for each experimental group/condition, given as a discrete number and unit of measurement
- A statement on whether measurements were taken from distinct samples or whether the same sample was measured repeatedly
- The statistical test(s) used AND whether they are one- or two-sided  
*Only common tests should be described solely by name; describe more complex techniques in the Methods section.*
- A description of all covariates tested
- A description of any assumptions or corrections, such as tests of normality and adjustment for multiple comparisons
- A full description of the statistical parameters including central tendency (e.g. means) or other basic estimates (e.g. regression coefficient) AND variation (e.g. standard deviation) or associated estimates of uncertainty (e.g. confidence intervals)
- For null hypothesis testing, the test statistic (e.g.  $F$ ,  $t$ ,  $r$ ) with confidence intervals, effect sizes, degrees of freedom and  $P$  value noted  
*Give  $P$  values as exact values whenever suitable.*
- For Bayesian analysis, information on the choice of priors and Markov chain Monte Carlo settings
- For hierarchical and complex designs, identification of the appropriate level for tests and full reporting of outcomes
- Estimates of effect sizes (e.g. Cohen's  $d$ , Pearson's  $r$ ), indicating how they were calculated

Our web collection on [statistics for biologists](#) contains articles on many of the points above.

### Software and code

Policy information about [availability of computer code](#)

Data collection Zen 2011 SP7 on Zeiss 710, 880 or 980 confocal microscope. QuantStudio 5 384 well block (Thermo Fisher).

Data analysis For snRNAseq, pre-processing of raw count matrices was performed using Seurat (v4.0.3) [doi:10.1016/j.cell.2021.04.048]. Gene expression values were normalised for library size using sctransform version 0.3 (doi: 10.1186/s13059-019-1874-1). The clustering parameters used were identified by evaluating the resulting cluster stability using ClustAssess doi:(10.1101/2022.01.31.478592). Data was integrated using Harmony version 0.1.1. doi: 10.1038/s41592-019-0619-0). Velocity (v0.17.17), and velocity.R (v0.6) were used to estimate RNA velocity based on prevalence of spliced and unspliced mRNA [doi: 10.1038/s41586-018-0414-6]. Gene set enrichment analysis (GSEA) was done using gprofiler2 (version 0.2.0). For snRNAseq Scripts for all bioinformatics analyses carried out are made available at <https://github.com/Co-re-Bioinformatics/NAFLD-NASH>. Prism 9 was used for creating graphs and statistical analyses. Images were analysed using Imaris 9.7.1.

For manuscripts utilizing custom algorithms or software that are central to the research but not yet described in published literature, software must be made available to editors and reviewers. We strongly encourage code deposition in a community repository (e.g. GitHub). See the Nature Portfolio [guidelines for submitting code & software](#) for further information.

## Data

Policy information about [availability of data](#)

All manuscripts must include a [data availability statement](#). This statement should provide the following information, where applicable:

- Accession codes, unique identifiers, or web links for publicly available datasets
- A description of any restrictions on data availability
- For clinical datasets or third party data, please ensure that the statement adheres to our [policy](#)

The sequencing data and raw expression matrix is available on the Gene Expression Omnibus (GEO) series entry GSE202379.  
R Shiny apps illustrating the analysis can be found at [https://bioinf.stemcells.cam.ac.uk/shiny/vallier/LiverPlasticity\\_GribbenGalanakis2023/](https://bioinf.stemcells.cam.ac.uk/shiny/vallier/LiverPlasticity_GribbenGalanakis2023/)

## Human research participants

Policy information about [studies involving human research participants and Sex and Gender in Research](#).

|                             |                                                                                                                                                                                                                                                                                                                                                                                                                                                                                                                                     |
|-----------------------------|-------------------------------------------------------------------------------------------------------------------------------------------------------------------------------------------------------------------------------------------------------------------------------------------------------------------------------------------------------------------------------------------------------------------------------------------------------------------------------------------------------------------------------------|
| Reporting on sex and gender | 30 males and 17 females were included in the dataset. Sex and age of patients are included Extended Data Table 1-2.                                                                                                                                                                                                                                                                                                                                                                                                                 |
| Population characteristics  | Samples from 47 patients were included in the snRNAseq data and organoids were derived from 10 patients. Population information is provided in extended tables 1-3.                                                                                                                                                                                                                                                                                                                                                                 |
| Recruitment                 | Patients were referred to Addenbrookes Hospital liver unit for liver biopsy due to suspected non-alcoholic fatty liver disease. Screening criteria: 18 years old or above, suspected NAFLD on referral, alcohol intake of less than 14 units / week.                                                                                                                                                                                                                                                                                |
| Ethics oversight            | Biopsy collection and processing of human samples was carried out under ethics approved by Addenbrookes hospital REC 18/WM/0397. The study met all criteria for responsible use of human tissue that is used in the UK. All patients were offered the patient information sheet and provided informed consent. Healthy deceased transplant organ donor tissue and explants were taken under ethics approved by NRES Committee East of England - Cambridge South (REC number REC 15/EE/152). All patients provided informed consent. |

Note that full information on the approval of the study protocol must also be provided in the manuscript.

## Field-specific reporting

Please select the one below that is the best fit for your research. If you are not sure, read the appropriate sections before making your selection.

- Life sciences       Behavioural & social sciences       Ecological, evolutionary & environmental sciences

For a reference copy of the document with all sections, see [nature.com/documents/nr-reporting-summary-flat.pdf](https://www.nature.com/documents/nr-reporting-summary-flat.pdf)

## Life sciences study design

All studies must disclose on these points even when the disclosure is negative.

|                 |                                                                                                                                                                                                                                                                                                                                                                                        |
|-----------------|----------------------------------------------------------------------------------------------------------------------------------------------------------------------------------------------------------------------------------------------------------------------------------------------------------------------------------------------------------------------------------------|
| Sample size     | No statistical analysis were performed to predetermine sample size. For snRNAseq all biopsies which were collected and successfully processed for snRNAseq based on bioinformatics QC were included in the dataset. All were included to allow for representation of all disease stages. For organoid experiments at least an n of 3 (where n is a different organoid line) were used. |
| Data exclusions | No data was excluded                                                                                                                                                                                                                                                                                                                                                                   |
| Replication     | For organoid experiments at least an n of 3 (where n is a different organoid line) were used. Details of n are given in figure legends.                                                                                                                                                                                                                                                |
| Randomization   | Patients were categorized by disease stage based on histology. For organoid work, cells were plated in different wells of a 24 well plate and were randomly allocated to experimental groups (control and treatments).                                                                                                                                                                 |
| Blinding        | Blinding was not possible for sample processing due to the logistics of patient sample collection and tissue processing.                                                                                                                                                                                                                                                               |

## Reporting for specific materials, systems and methods

We require information from authors about some types of materials, experimental systems and methods used in many studies. Here, indicate whether each material, system or method listed is relevant to your study. If you are not sure if a list item applies to your research, read the appropriate section before selecting a response.

## Materials &amp; experimental systems

## Methods

| n/a                                 | Included in the study                                     |
|-------------------------------------|-----------------------------------------------------------|
| <input type="checkbox"/>            | <input checked="" type="checkbox"/> Antibodies            |
| <input type="checkbox"/>            | <input checked="" type="checkbox"/> Eukaryotic cell lines |
| <input checked="" type="checkbox"/> | <input type="checkbox"/> Palaeontology and archaeology    |
| <input checked="" type="checkbox"/> | <input type="checkbox"/> Animals and other organisms      |
| <input checked="" type="checkbox"/> | <input type="checkbox"/> Clinical data                    |
| <input checked="" type="checkbox"/> | <input type="checkbox"/> Dual use research of concern     |

| n/a                                 | Included in the study                           |
|-------------------------------------|-------------------------------------------------|
| <input checked="" type="checkbox"/> | <input type="checkbox"/> ChIP-seq               |
| <input checked="" type="checkbox"/> | <input type="checkbox"/> Flow cytometry         |
| <input checked="" type="checkbox"/> | <input type="checkbox"/> MRI-based neuroimaging |

## Antibodies

## Antibodies used

Albumin (Bethyl A80-229A)  
 K19 (abcam ab7754)  
 K7 (abcam ab68459)  
 MRP2 (abcam ab3373)  
 GLUL (abcam ab125724)  
 ASS1 (Cambridge Bioscience HPA020896)  
 SOX4 (ab86809)  
 K23 (Cambridge Bioscience HPA016959)  
 GSTA1 (abcam ab53940)  
 HepPar1 (Agilent Dako clone OCH1E5)  
 KLF6 (Sigma HPA069585)  
 NCAM1 (Sigma HPA039835)  
 Alexa fluor 488 donkey anti-goat (Invitrogen A11055)  
 Alexa fluor 568 donkey anti-rabbit (Invitrogen A10042)  
 Alexa fluor 647 donkey anti-mouse (Invitrogen A31571).  
 FlexAble CoraLite® Plus 647 Antibody Labeling Kit for Rabbit IgG  
 FlexAble CoraLite® Plus 647 Antibody Labeling Kit for Mouse IgG1  
 FlexAble CoraLite® Plus 555 Antibody Labeling Kit for Rabbit IgG  
 FlexAble CoraLite® Plus 555 Antibody Labeling Kit for Mouse IgG1  
 FlexAble CoraLite® Plus 488 Antibody Labeling Kit for Mouse IgG1  
 FlexAble CoraLite® Plus 488 Antibody Labeling Kit for Rabbit IgG

## Validation

Albumin (Bethyl A80-229A) <https://www.thermofisher.com/antibody/product/Human-Albumin-Antibody-Polyclonal/A80-229A>  
 K19 (abcam ab7754) <https://www.abcam.com/cytokeratin-19-antibody-a53-ba2-cytoskeleton-marker-ab7754.html>  
 K7 (abcam ab68459) <https://www.abcam.com/cytokeratin-7-antibody-epr1619y-cytoskeleton-marker-ab68459.html>  
 MRP2 (abcam ab3373) <https://www.abcam.com/mrp2-antibody-m2-iii-6-ab3373.html>  
 GLUL (abcam ab125724) <https://www.abcam.com/glutamine-synthetase-antibody-6glutamine-synthetase-ab125724.html>  
 ASS1 (Cambridge Bioscience HPA020896) <https://www.bioscience.co.uk/product~683967>. Validated as part of the Human Protein Atlas.  
 SOX4 (ab86809) <https://www.abcam.com/sox4-antibody-ab86809.html>.  
 K23 (Cambridge Bioscience HPA016959) <https://www.bioscience.co.uk/product~682837>. Validated as part of the Human Protein Atlas.  
 GSTA1 (abcam ab53940) <https://www.abcam.com/gsta1-antibody-ab53940.html>  
 HepPar1 (Agilent Dako clone OCH1E5) <https://www.agilent.com/en/product/immunohistochemistry/antibodies-controls/primary-antibodies/hepatocyte-%28dako-omnis%29-76237>  
 KLF6 (Sigma HPA069585) <https://www.sigmaaldrich.com/GB/en/product/sigma/hpa069585>  
 NCAM1 (Sigma HPA039835) <https://www.sigmaaldrich.com/GB/en/product/sigma/hpa039835>  
 Alexa fluor 488 donkey anti-goat (Invitrogen A11055) <https://www.thermofisher.com/antibody/product/Donkey-anti-Goat-IgG-H-L-Cross-Adsorbed-Secondary-Antibody-Polyclonal/A-11055>  
 Alexa fluor 568 donkey anti-rabbit (Invitrogen A10042) <https://www.thermofisher.com/antibody/product/Donkey-anti-Rabbit-IgG-H-L-Highly-Cross-Adsorbed-Secondary-Antibody-Polyclonal/A10042>  
 Alexa fluor 647 donkey anti-mouse (Invitrogen A31571). <https://www.thermofisher.com/antibody/product/Donkey-anti-Mouse-IgG-H-L-Highly-Cross-Adsorbed-Secondary-Antibody-Polyclonal/A-31571>  
<https://www.ptglab.com/products/FlexAble-CoraLite-Plus-647-Antibody-Labeling-Kit-for-Rabbit-IgG-KFA003.htm#:~:text=Product%20Information-,FlexAble%20CoraLite%20Plus%20647%20Antibody%20Labeling%20Kit%20for%20Rabbit,primary%20antibodies%20from%20any%20supplier.>  
<https://www.ptglab.com/products/FlexAble-CoraLite-Plus-647-Antibody-Labeling-Kit-for-Mouse-IgG1-KFA023.htm#:~:text=Product%20Information-,FlexAble%20CoraLite%20Plus%20647%20Antibody%20Labeling%20Kit%20for%20Mouse,primary%20antibodies%20from%20any%20supplier.>  
<https://www.ptglab.com/products/FlexAble-CoraLite-Plus-555-Antibody-Labeling-Kit-for-Rabbit-IgG-KFA002.htm>  
<https://www.fishersci.co.uk/shop/products/flexible-coralite-plus-550-antibody-labeling-kit-mouse-igg1-3/p-7227370>  
<https://www.ptglab.com/products/FlexAble-CoraLite-488-Antibody-Labeling-Kit-for-Rabbit-IgG-KFA001.htm>  
<https://www.ptglab.com/products/FlexAble-CoraLite-488-Antibody-Labeling-Kit-for-Rabbit-IgG-KFA001.htm>

## Eukaryotic cell lines

---

Policy information about [cell lines](#) and [Sex and Gender in Research](#)

|                                                                      |                                                                                                                            |
|----------------------------------------------------------------------|----------------------------------------------------------------------------------------------------------------------------|
| Cell line source(s)                                                  | 12 organoid lines were derived in this study (from 8 males and 4 females). Age and sex are listed in extended data table 4 |
| Authentication                                                       | Organoid lines were derived from samples collected straight from clinic.                                                   |
| Mycoplasma contamination                                             | All lines tested negative for mycoplasma contamination.                                                                    |
| Commonly misidentified lines<br>(See <a href="#">ICLAC</a> register) | None were used in this study                                                                                               |
