# Supplementary material for: Acquisition of epithelial plasticity in human chronic liver disease
Source: PubMed Central journal article supplement (PMC11153150; doi:10.1038/s41586-024-07465-2), 2024-05-22
Supplement: 41586_2024_7465_MOESM3_ESM.pdf [file 41586_2024_7465_MOESM3_ESM.pdf]

| <b>Patient ID</b> | <b>Disease status</b> | <b>SAF Score</b> | <b>Sex</b> | <b>Age</b> | <b>BMI</b> | <b>Ethnic group</b>               |
|-------------------|-----------------------|------------------|------------|------------|------------|-----------------------------------|
| 3                 | MASH w/o cirrhosis    | S2A3F1           | M          | 56         | 38.01      | White British                     |
| 6                 | MASH w/o cirrhosis    | S2A3F1           | M          | 46         | 41.86      | White British                     |
| 7                 | MASH w/o cirrhosis    | S3A4F2           | M          | 47         | 34.46      | White British                     |
| 8                 | MASH w/o cirrhosis    | S2A4F3           | M          | 65         | 32.46      | White British                     |
| 9                 | MASH w/o cirrhosis    | S2A2F1           | M          | 50         | 36.68      | White British                     |
| 11                | MASH w/o cirrhosis    | S2A4F3           | M          | 63         | 44.08      | White British                     |
| 15                | MASH w/o cirrhosis    | S2A4F3           | M          | 65         | 44.9       | White British                     |
| 16                | MASH w/o cirrhosis    | S1A4F3           | F          | 70         | 27.41      | White British                     |
| 19                | MASH w/o cirrhosis    | S1A4F3           | M          | 76         | 26.62      | White British                     |
| 20                | MASH w/o cirrhosis    | S2A3F3           | F          | 71         | 48.96      | White British                     |
| 21                | MASH w/o cirrhosis    | S2A3F2           | M          | 60         | 34.46      | White British                     |
| 48                | MASH w/o cirrhosis    | S1A2F2           | F          | 44         | 30.8       | White British                     |
| 49                | MASH w/o cirrhosis    | S1A3F2           | F          | 55         | 31.35      | White British                     |
| 50                | MASH w/o cirrhosis    | S3A3F2           | M          | 45         | 29.5       | White British                     |
| 52                | MASH w/o cirrhosis    | S2A2F1           | M          | 49         | 31.96      | White British                     |
| 53                | MASH w/o cirrhosis    | S2A4F3           | M          | 57         | 28.37      | White British                     |
| 54                | MASH w/o cirrhosis    | S3A3F2           | F          | 61         | 37.73      | White British                     |
| 57                | MASH w/o cirrhosis    | S2A3F2           | F          | 53         | 38.94      | White British                     |
| 62                | MASH w/o cirrhosis    | S2A3F3           | M          | 60         | 34.41      | White British                     |
| 64                | MASH w/o cirrhosis    | S3A3F1           | F          | 55         | 37.41      | White British                     |
| 67                | MASH w/o cirrhosis    | S2A2F3           | F          | 67         | 28.83      | White British                     |
| 70                | MASH w/o cirrhosis    | S2A3F3           | M          | 59         | 35.49      | White British                     |
| 71                | MASH w/o cirrhosis    | S2A4F2           | F          | 32         | 42.79      | White British                     |
| 72                | MASH w/o cirrhosis    | S2A3F3           | M          | 41         | 33.16      | White British                     |
| 73                | MASH w/o cirrhosis    | S2A3F1           | F          | 59         | 37.08      | White British                     |
| 76                | MASH w/o cirrhosis    | S1A3F2           | M          | 55         | 34.81      | White British                     |
| 77                | MASH w/o cirrhosis    | S1A3F2           | F          | 62         | 31.25      | White British                     |
| 83                | MASH w/o cirrhosis    | S2A4F2           | M          | 56         | 33.5       | White British                     |
| 12                | MASH with cirrhosis   | S2A3F4           | F          | 48         | 45.9       | White British                     |
| 22                | MASH with cirrhosis   | S1A3F4           | M          | 55         | 29.4       | other white background (Portugal) |
| 68                | MASH with cirrhosis   | S1A3F4           | F          | 66         | 42.91      | White British                     |
| 75                | MASH with cirrhosis   | S1A3F4           | M          | 60         | 37.49      | White British                     |
| 51                | MASLD                 | S1A1F1           | M          | 57         | 38.84      | White British                     |
| 55                | MASLD                 | S1A1F2           | M          | 21         | 45.14      | White British                     |
| 56                | MASLD                 | S1A1F1           | F          | 47         | 42.95      | White British                     |
| 60                | MASLD                 | S1A1F0           | M          | 53         | 33.53      | White British                     |
| 78                | MASLD                 | S1A1F0           | M          | 53         | 32.48      | White British                     |
| 84                | MASLD                 | S1A0F3           | M          | 56         | 28         | White British                     |
| CL103             | end stage             | end stage        | M          | 59         | 43.57      | White British                     |
| CL104             | end stage             | end stage        | F          | 59         | 32         | White British                     |
| CL17              | end stage             | end stage        | M          | 72         | 26.36      | White British                     |
| CL18              | end stage             | end stage        | F          | 68         | 30.13      | White British                     |
| CL16              | end stage             | end stage        | M          | 63         | 53         | White British                     |

### Supplementary table 1

Demographics of patients included in snRNAseq.

| Patient ID | Disease status  | SAF Score       | Gender | Age | BMI   | Ethnic group            | Notes                                                                                                                   | Liver function tests                                                                                                 |
|------------|-----------------|-----------------|--------|-----|-------|-------------------------|-------------------------------------------------------------------------------------------------------------------------|----------------------------------------------------------------------------------------------------------------------|
| 30         | Healthy control | S0A1F0          | M      | 49  | 26.16 | White British           | Screening biopsy - No MASLD/MASH diagnosis                                                                              | Bilirubin (0 – 20 umol/L) 17<br>ALP (30 – 130 U/L) 65<br>ALT(10 – 49 U/L) 46<br>Aspartate Transaminase (<=34 U/L)    |
| 98         | Healthy control | S1A1F1          | M      | 57  | 33.9  | Nigerian                | Screening biopsy -No MASLD/MASH diagnosis. Diagnosed with biliary stones                                                | Bilirubin (0 – 20 umol/L) 16<br>ALP (30 – 130 U/L) 45<br>ALT(10 – 49 U/L) 58<br>Aspartate Transaminase (<=34 U/L) 34 |
| HL1        | Healthy control | healthy control | M      | 38  | 32    | White British           | Reason for liver transplant rejection: Congenital heart disease altered vasculature anatomy and patchy liver perfusion. | Bilirubin (0 – 20 umol/L) 5<br>ALP (30 – 130 U/L) 91<br>ALT(10 – 49 U/L) 28                                          |
| HL2        | Healthy control | healthy control | F      | 74  | n/a   | White British ethnicity | Reason for liver transplant rejection: Combination of alcohol intake and liver lesion on hepatic segment 6.             | Bilirubin (0 – 20 umol/L) 11<br>ALP (30 – 130 U/L) 84<br>ALT(10 – 49 U/L) 11                                         |

### Supplementary table 2

Demographics of healthy deceased transplant organ donors included in snRNAseq with notes on samples.

| Hepatocytes | Cholangiocytes | Stellate cells | Endothelial | Lymphocytes | Macrophages | Neutrophils | B cells 1 | B cells 2 |
|-------------|----------------|----------------|-------------|-------------|-------------|-------------|-----------|-----------|
| ASGR1       | CFTR           | DCN            | KDR         | IL7R        | NDST3       | FCN1        | BANK1     | IGKC      |
| TFR2        | BICC1          | COL3A1         | FCN3        | CD96        | MARCO       | ITGAX       | PAX5      | FCRL5     |
| APOC1       | PKHD1          | PTH1R          | FLT1        | BCL11B      | CD163       |             | IGKC      |           |
| ADH4        | CTNND2         | ADAMTSL2       | OIT3        | THEMIS      | MSR1        |             | FCRL5     |           |
| HPX         | RAYL           | CCBE1          | STAB2       | CD247       | GAS7        |             |           |           |
| C3          | KRT19          | ADAMTS2        | TEK         | PTPRC       | CD5L        |             |           |           |
| FGB         | KRT7           | ADAMTSL1       | PTPRB       |             |             |             |           |           |
| PLG         | SOX9           |                | FCN2        |             |             |             |           |           |
| FYB2        | SPP1           |                |             |             |             |             |           |           |
| APOB        | MUC1           |                |             |             |             |             |           |           |
| GHR         | MUC6           |                |             |             |             |             |           |           |
| TENM2       |                |                |             |             |             |             |           |           |
| CYP3A4      |                |                |             |             |             |             |           |           |
| CPS1        |                |                |             |             |             |             |           |           |
| ASS1        |                |                |             |             |             |             |           |           |
| GLUL        |                |                |             |             |             |             |           |           |

### Supplementary table 3

Markers used in annotation of cell types in snRNAseq data.

| <b>Organoid lines</b> | <b>Disease stage</b>      | <b>Age</b> | <b>Gender</b> |
|-----------------------|---------------------------|------------|---------------|
| CL2                   | End stage – explant       | 54         | male          |
| CL3                   | End stage – explant       | 67         | male          |
| CL17                  | End stage – explant       | 71         | male          |
| CL18                  | End stage – explant       | 67         | female        |
| CL103                 | End stage – explant       | 58         | male          |
| CL104                 | End stage – explant       | 59         | female        |
| CL109                 | End stage – explant       | 61         | male          |
| CL117                 | End stage – explant       | 55         | female        |
| HL1                   | Healthy – cadaveric donor | 38         | male          |
| HL4                   | Healthy – cadaveric donor | 41         | Male          |
| HL6                   | Healthy – cadaveric donor | 37         | Female        |
| HL3                   | Healthy – cadaveric donor | 44         | Male          |

**Supplementary table 4**

Demographics of patients from which organoid lines were generated.
